# Supplementary material for: A detailed mechanism of the oxidative half-reaction ofd-amino acid oxidase: another route for flavin oxidation
Source: Royal Society of Chemistry journal article supplement (doi:10.1039/c9ob00975b), 2019-01-01

**Supporting Information for:**

Detailed mechanism of the oxidative half-reaction of D-amino acid oxidase:  
another route for flavin oxidation

*Dóra Judit Kiss and György G. Ferenczy*

Table of Contents

|                                            |     |
|--------------------------------------------|-----|
| 1. Table S1.....                           | S2  |
| 2. Table S2 .....                          | S4  |
| 3. Table S3 .....                          | S5  |
| 4. Table S4 .....                          | S6  |
| 5. Coordinates of computed structures..... | S7  |
| 6. Scheme S1 .....                         | S8  |
| 7. Figure S1.....                          | S9  |
| 8. Figure S2.....                          | S10 |

Table S1. Atomic charges of the QM system in stationary points as obtained with B3LYP/6-31+G\*\* basis set using NBO analysis.

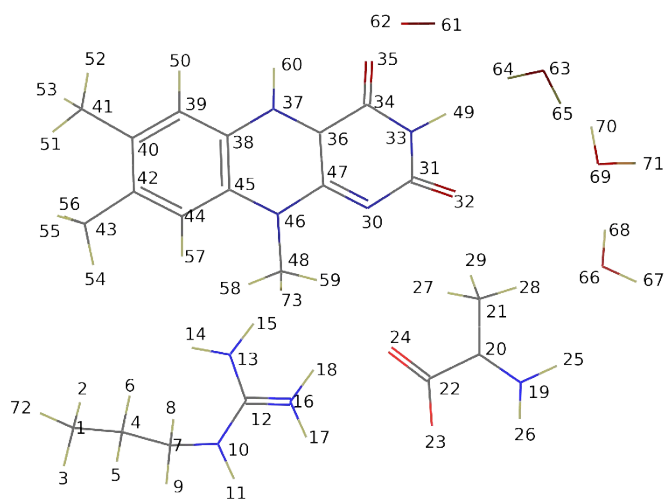

|     | $O1^T$ | $O1^{OSS}$ | $O2a^{CSS}$ | $O3^{CSS}$ |
|-----|--------|------------|-------------|------------|
| C 1 | -0.689 | -0.689     | -0.689      | -0.689     |
| H 2 | 0.253  | 0.254      | 0.254       | 0.256      |
| H 3 | 0.259  | 0.259      | 0.258       | 0.257      |
| C 4 | -0.494 | -0.494     | -0.493      | -0.491     |
| H 5 | 0.266  | 0.266      | 0.263       | 0.258      |
| H 6 | 0.228  | 0.228      | 0.229       | 0.227      |
| C 7 | -0.279 | -0.279     | -0.279      | -0.279     |
| H 8 | 0.246  | 0.246      | 0.247       | 0.246      |
| H 9 | 0.268  | 0.268      | 0.267       | 0.268      |
| N10 | -0.651 | -0.651     | -0.653      | -0.661     |
| H11 | 0.481  | 0.481      | 0.482       | 0.482      |
| C12 | 0.685  | 0.685      | 0.684       | 0.682      |
| N13 | -0.898 | -0.898     | -0.899      | -0.904     |
| H14 | 0.458  | 0.458      | 0.457       | 0.453      |
| H15 | 0.470  | 0.470      | 0.470       | 0.468      |
| N16 | -0.842 | -0.842     | -0.840      | -0.845     |
| H17 | 0.471  | 0.471      | 0.472       | 0.473      |
| H18 | 0.458  | 0.459      | 0.457       | 0.453      |
| N19 | -0.681 | -0.681     | -0.688      | -0.719     |
| C20 | 0.377  | 0.377      | 0.377       | 0.250      |
| C21 | -0.765 | -0.765     | -0.764      | -0.742     |
| C22 | 0.771  | 0.771      | 0.779       | 0.778      |
| O23 | -0.763 | -0.763     | -0.768      | -0.788     |
| O24 | -0.712 | -0.712     | -0.707      | -0.733     |
| H25 | 0.481  | 0.481      | 0.479       | 0.533      |
| H26 | 0.494  | 0.494      | 0.496       | 0.434      |
| H27 | 0.286  | 0.286      | 0.287       | 0.267      |

|     |        |        |        |        |
|-----|--------|--------|--------|--------|
| H28 | 0.273  | 0.273  | 0.273  | 0.248  |
| H29 | 0.307  | 0.307  | 0.302  | 0.269  |
| N30 | -0.631 | -0.631 | -0.620 | -0.613 |
| C31 | 0.807  | 0.807  | 0.829  | 0.829  |
| O32 | -0.765 | -0.764 | -0.744 | -0.722 |
| N33 | -0.672 | -0.672 | -0.676 | -0.677 |
| C34 | 0.628  | 0.628  | 0.678  | 0.679  |
| O35 | -0.669 | -0.667 | -0.681 | -0.639 |
| C36 | 0.032  | 0.031  | 0.130  | 0.106  |
| N37 | -0.505 | -0.505 | -0.361 | -0.338 |
| C38 | 0.154  | 0.153  | 0.101  | 0.104  |
| C39 | -0.243 | -0.241 | -0.168 | -0.184 |
| C40 | -0.052 | -0.051 | -0.077 | -0.064 |
| C41 | -0.701 | -0.701 | -0.699 | -0.701 |
| C42 | -0.056 | -0.056 | -0.019 | -0.007 |
| C43 | -0.699 | -0.699 | -0.702 | -0.703 |
| C44 | -0.219 | -0.217 | -0.255 | -0.249 |
| C45 | 0.170  | 0.168  | 0.192  | 0.205  |
| N46 | -0.360 | -0.360 | -0.338 | -0.328 |
| C47 | 0.438  | 0.440  | 0.455  | 0.448  |
| C48 | -0.475 | -0.476 | -0.479 | -0.481 |
| H49 | 0.464  | 0.464  | 0.462  | 0.487  |
| H50 | 0.262  | 0.262  | 0.258  | 0.268  |
| H51 | 0.232  | 0.232  | 0.231  | 0.235  |
| H52 | 0.248  | 0.248  | 0.246  | 0.250  |
| H53 | 0.253  | 0.253  | 0.249  | 0.251  |
| H54 | 0.244  | 0.244  | 0.249  | 0.251  |
| H55 | 0.220  | 0.220  | 0.219  | 0.224  |
| H56 | 0.258  | 0.258  | 0.260  | 0.262  |
| H57 | 0.263  | 0.263  | 0.269  | 0.269  |
| H58 | 0.217  | 0.217  | 0.217  | 0.220  |
| H59 | 0.225  | 0.225  | 0.235  | 0.241  |
| H60 | 0.483  | 0.483  | 0.511  | 0.531  |
| O61 | -0.419 | -0.422 | -0.615 | -0.601 |
| O62 | -0.426 | -0.428 | -0.610 | -0.554 |
| O63 | -1.084 | -1.085 | -1.126 | -1.103 |
| H64 | 0.533  | 0.533  | 0.528  | 0.535  |
| H65 | 0.543  | 0.542  | 0.554  | 0.577  |
| O66 | -1.075 | -1.075 | -1.075 | -1.067 |
| H67 | 0.562  | 0.562  | 0.562  | 0.550  |
| H68 | 0.540  | 0.540  | 0.539  | 0.542  |
| O69 | -1.098 | -1.098 | -1.107 | -1.096 |
| H70 | 0.544  | 0.544  | 0.545  | 0.544  |
| H71 | 0.564  | 0.564  | 0.566  | 0.559  |
| H72 | 0.162  | 0.162  | 0.161  | 0.158  |
| H73 | 0.348  | 0.348  | 0.351  | 0.353  |

Table S2. QM/MM energies of the stationary points along the proposed pathway shown in blue in Figure 4. Geometries are calculated at QM/MM B3LYP/6-31G\* level and energies at B3LYP/6-31+G\*\* level. Energies of states with partial open shell singlet character were corrected using Eqs. 1-2. See Scheme 2 for the designation of states.

| State                      | Energy (kcal mol <sup>-1</sup> ) |
|----------------------------|----------------------------------|
| O1 <sup>T</sup>            | -1204809.852                     |
| MECP                       | -1204806.009                     |
| O1 <sup>OSS</sup>          | -1204810.857                     |
| TS <sup>O1OSS→O2aCSS</sup> | -1204807.663                     |
| O2a <sup>CSS</sup>         | -1204820.204                     |
| TS <sup>O2aCSS→O3CSS</sup> | -1204810.517                     |
| O3 <sup>CSS</sup>          | -1204828.765                     |

Table S3. QM/MM energies of the stationary points along the pathway shown in red in Figure 4. Geometries are calculated at QM/MM B3LYP/6-31G\* level and energies at B3LYP/6-31+G\*\* level. Energies of states with partial open shell singlet character were corrected using Eqs. 1-2. See Scheme 2 for the designation of states.

| State                      | Energy (kcal mol <sup>-1</sup> ) |
|----------------------------|----------------------------------|
| TS <sup>O1OSS→O2bOSS</sup> | -1204789.863                     |
| O2b <sup>OSS</sup>         | -1204798.750                     |

Table S4. QM/MM energies of the stationary points along the covalent pathway (Scheme S1). Geometries are calculated at QM/MM B3LYP/6-31G\* level and energies at B3LYP/6-31+G\*\* level.

| State                     | Energy (kcal mol <sup>-1</sup> ) |
|---------------------------|----------------------------------|
| TS <sup>O1OSS→O2cov</sup> | -1204798.24                      |
| O2 <sup>cov</sup>         | -1204814.50                      |

## Coordinates of computed structures

Correspondence between structures (states) and files names. Files contain atomic coordinates in pdb format. See Schemes 2 and S1 for the designation of states.

| <u>State</u>               | <u>File name</u> |
|----------------------------|------------------|
| O1 <sup>T</sup>            | O1T.pdb          |
| MECP                       | MECP.pdb         |
| O1 <sup>OSS</sup>          | O1_OSS.pdb       |
| TS <sup>O1→O2aCSS</sup>    | O1TS_OSS.pdb     |
| O2a <sup>CSS</sup>         | O2_CSS.pdb       |
| TS <sup>O2aCSS→O3CSS</sup> | O2TS_CSS.pdb     |
| O3 <sup>CSS</sup>          | O3_CSS.pdb       |
| TS <sup>O1→O2bOSS</sup>    | O1TSbOSS.pdb     |
| O2b <sup>OSS</sup>         | O2OSSb.pdb       |
| TS <sup>O1→O2cov</sup>     | O1TS_cov.pdb     |
| O2 <sup>cov</sup>          | O2_cov.pdb       |

Scheme S1. Covalent pathway investigated for the oxidative half-reaction of DAAO. The non-covalent pathway is shown as reference. T denotes triplet, OSS open shell singlet and CSS closed shell singlet states. The substrate does not change in the last step shown, therefore it is omitted in the second part of the scheme.

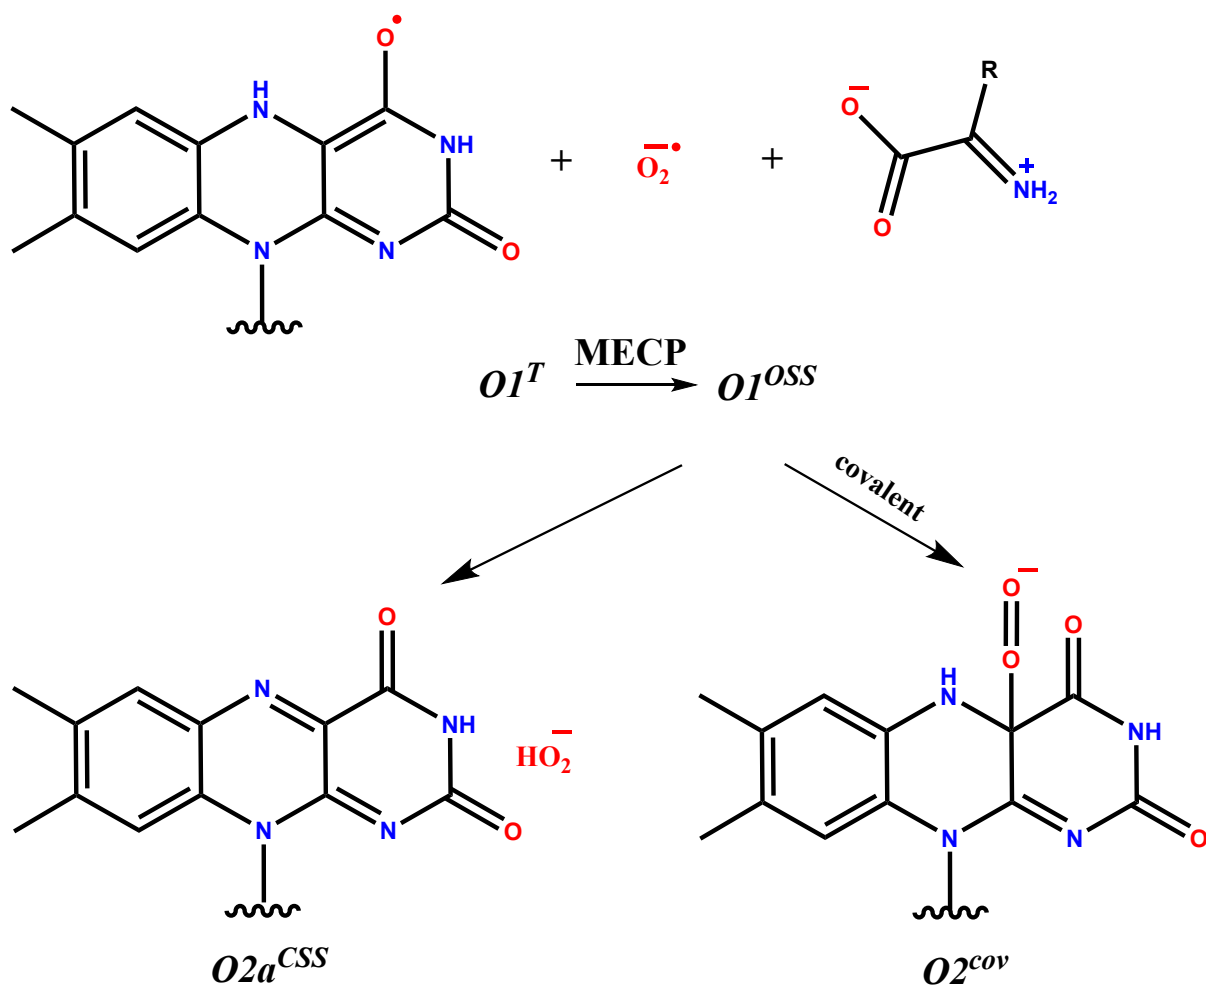



Figure S1. Characteristic geometrical parameters of the intermediates *R1* (a) and *R2* (c) and the transition state *R1TS* (b) for the reductive half-reaction.

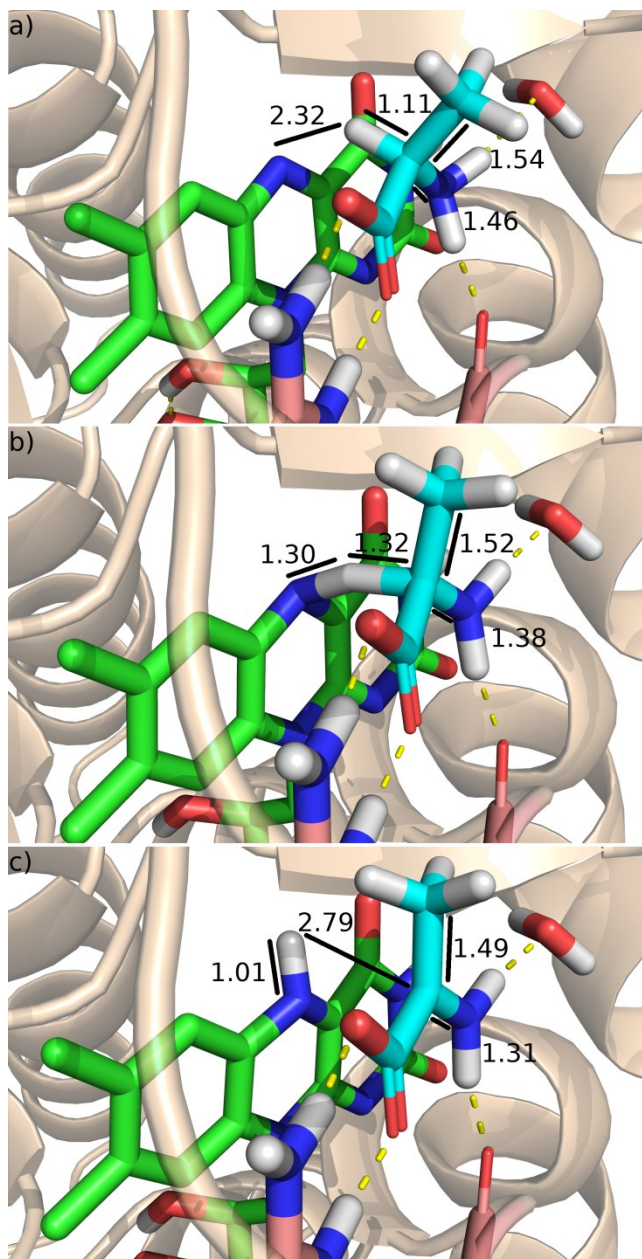

Figure S2. Energy profile of the covalent (red) and non-covalent (blue) pathways shown on Scheme S1. Geometries are calculated at QM/MM B3LYP/6-31G\* level and energies at B3LYP/6-31+G\*\* level.

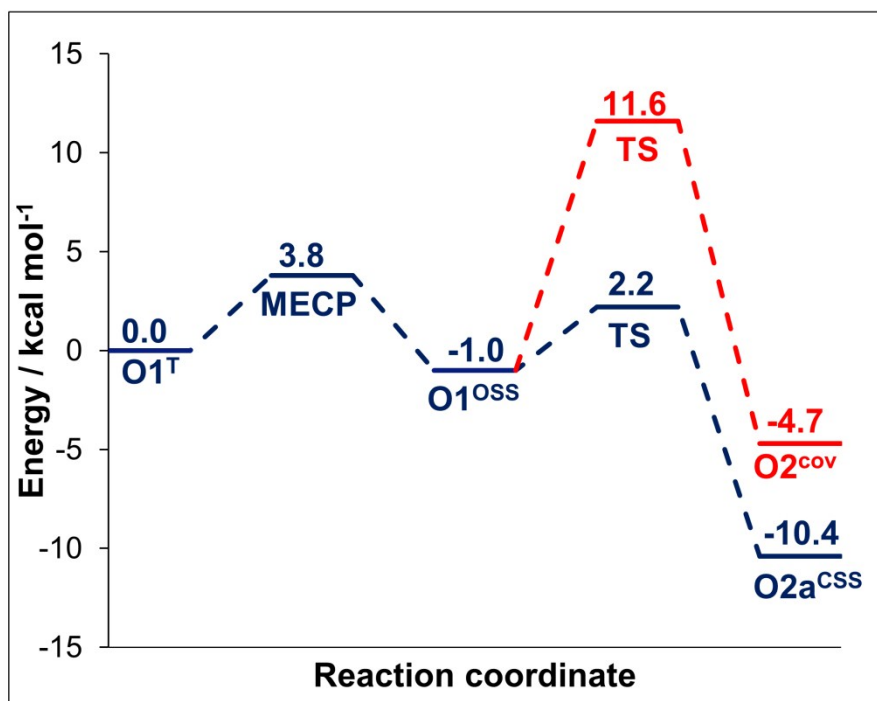

Supplement: c9ob00975b1.pdf [file c9ob00975b1.pdf]
